# Supplementary material for: Impact of Type II LRRK2 inhibitors on signaling and mitophagy
Source: PubMed Central journal article supplement (PMC8589421; doi:10.1042/bcj20210375), 2021-10-06

# Supplementary Figure 1A

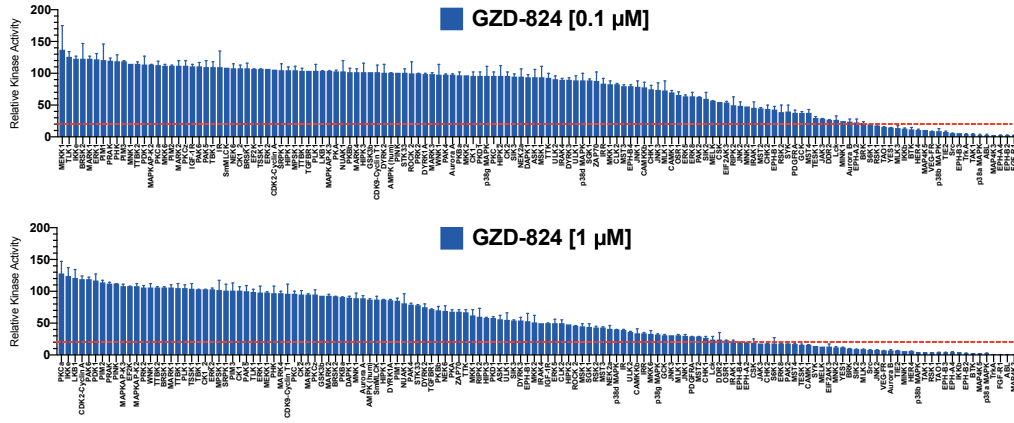

# Supplementary Figure 1B

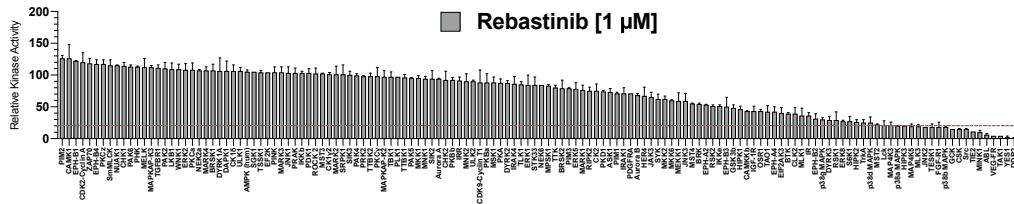

# Supplementary Figure 1C

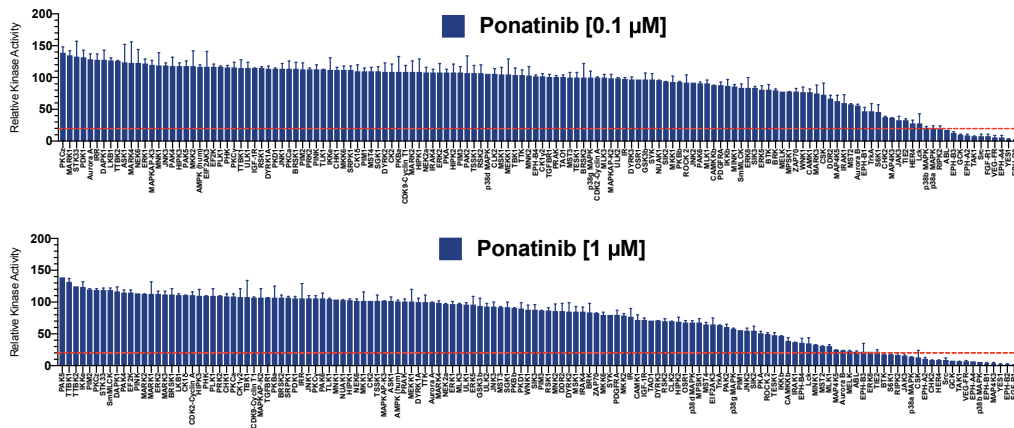

# Supplementary Figure 1D

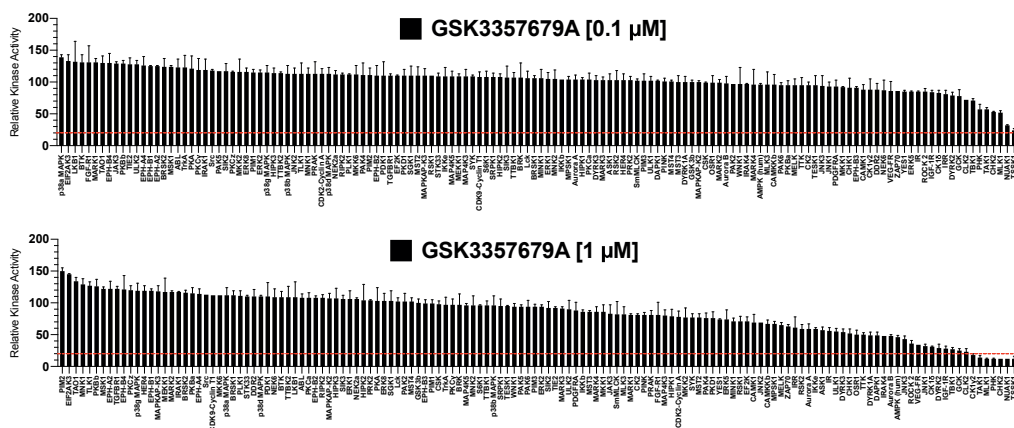

# Supplementary Figure 2

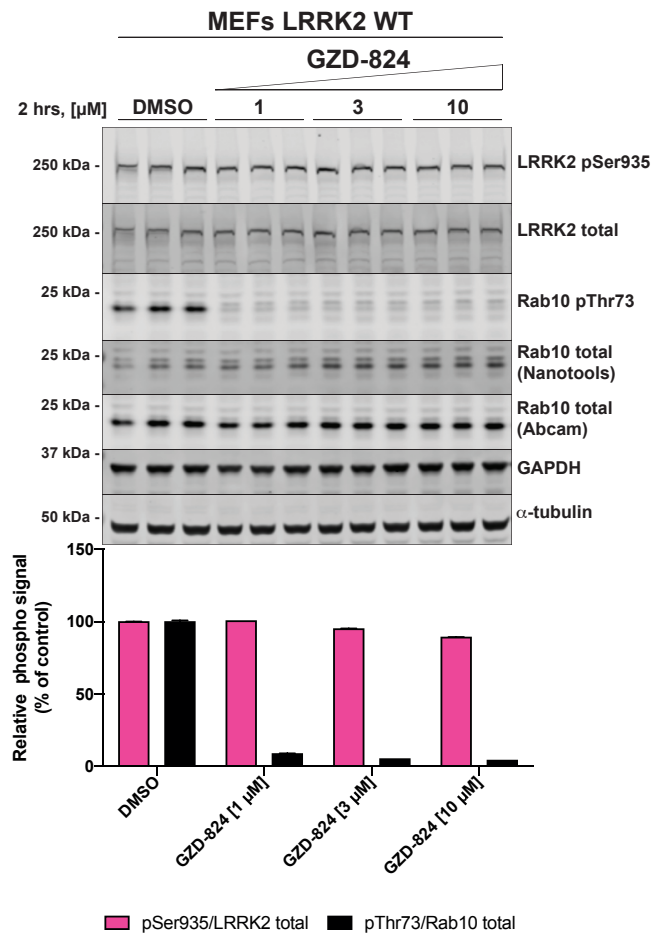

# HeLa cells transfected with GFP-LRRK2 WT and HA-Rab29 treated +/- inhibitor

Supplementary Figure 3

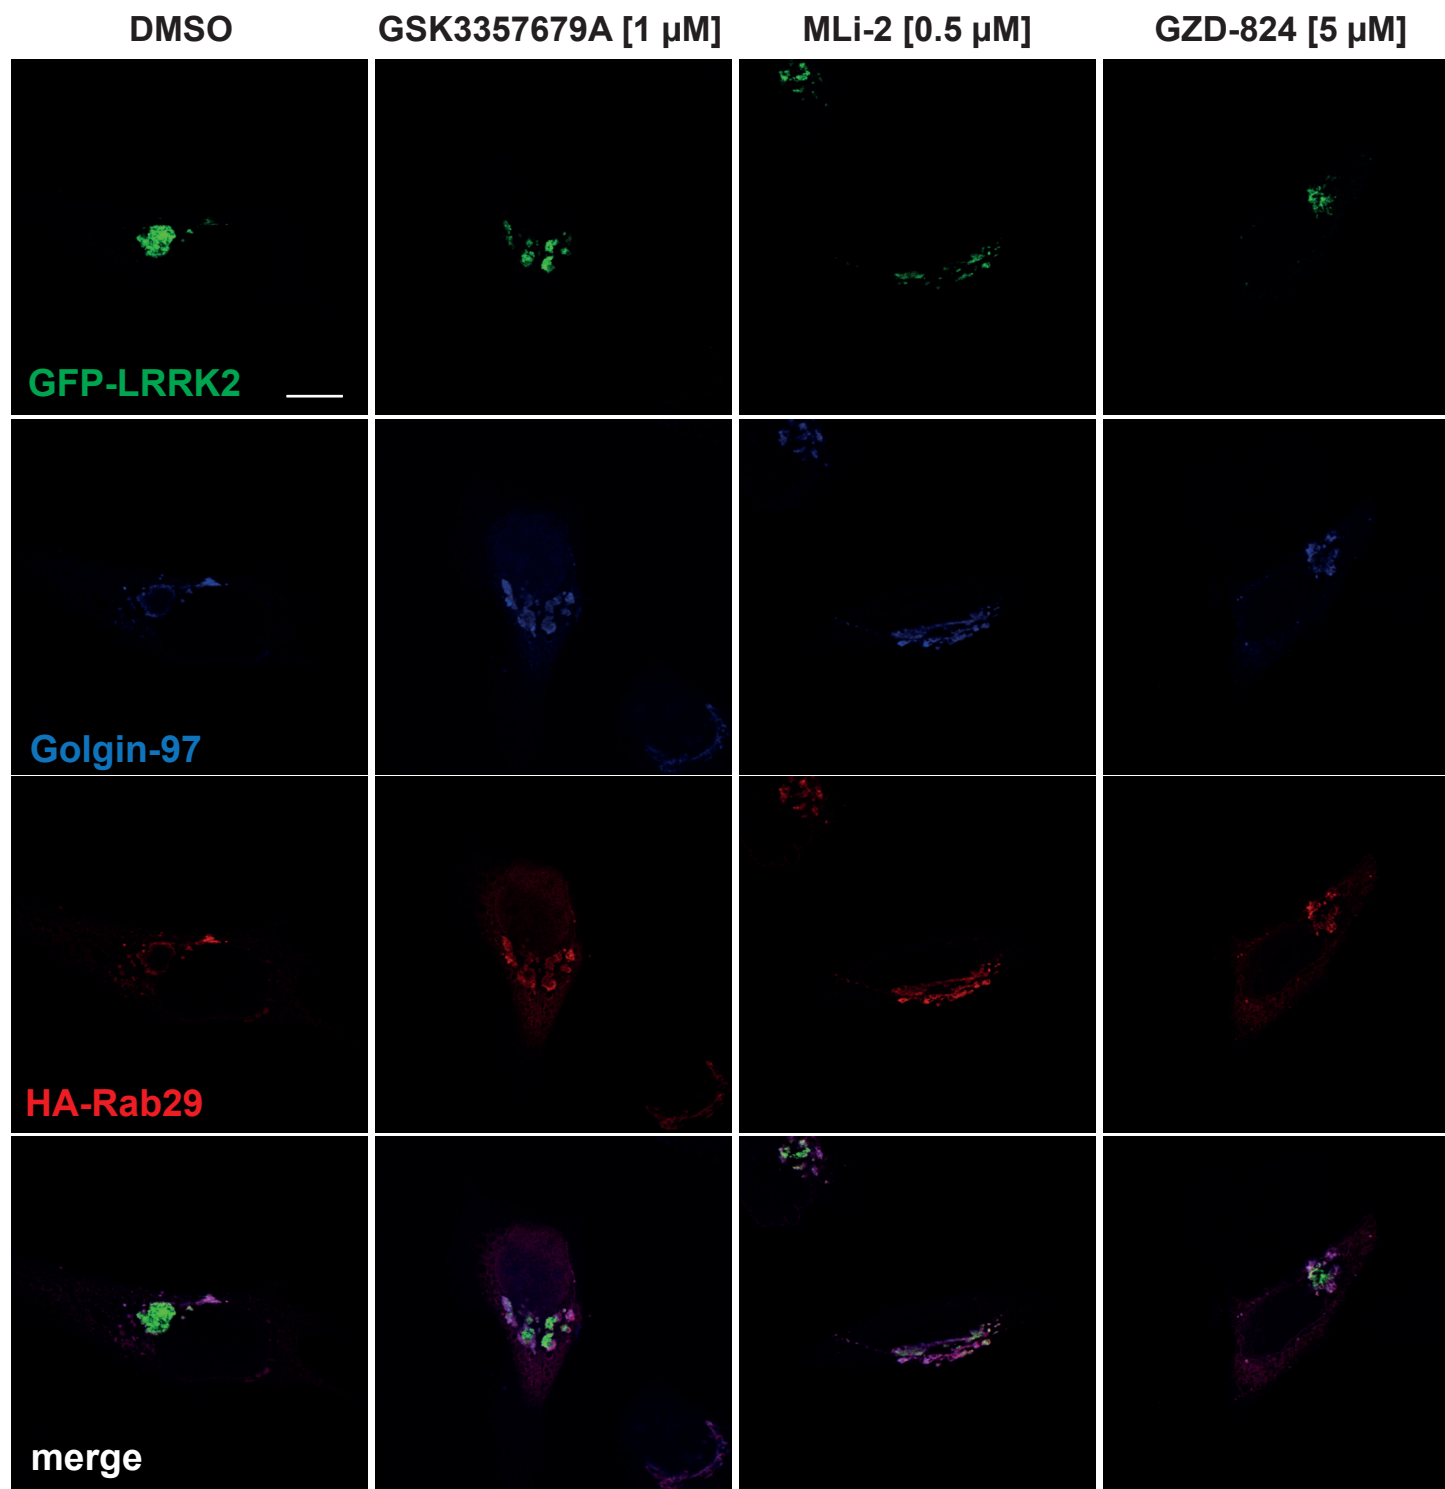

# HeLa cells transfected with GFP-LRRK2 WT (no HA-Rab29) treated +/- inhibitor

Supplementary Figure 4

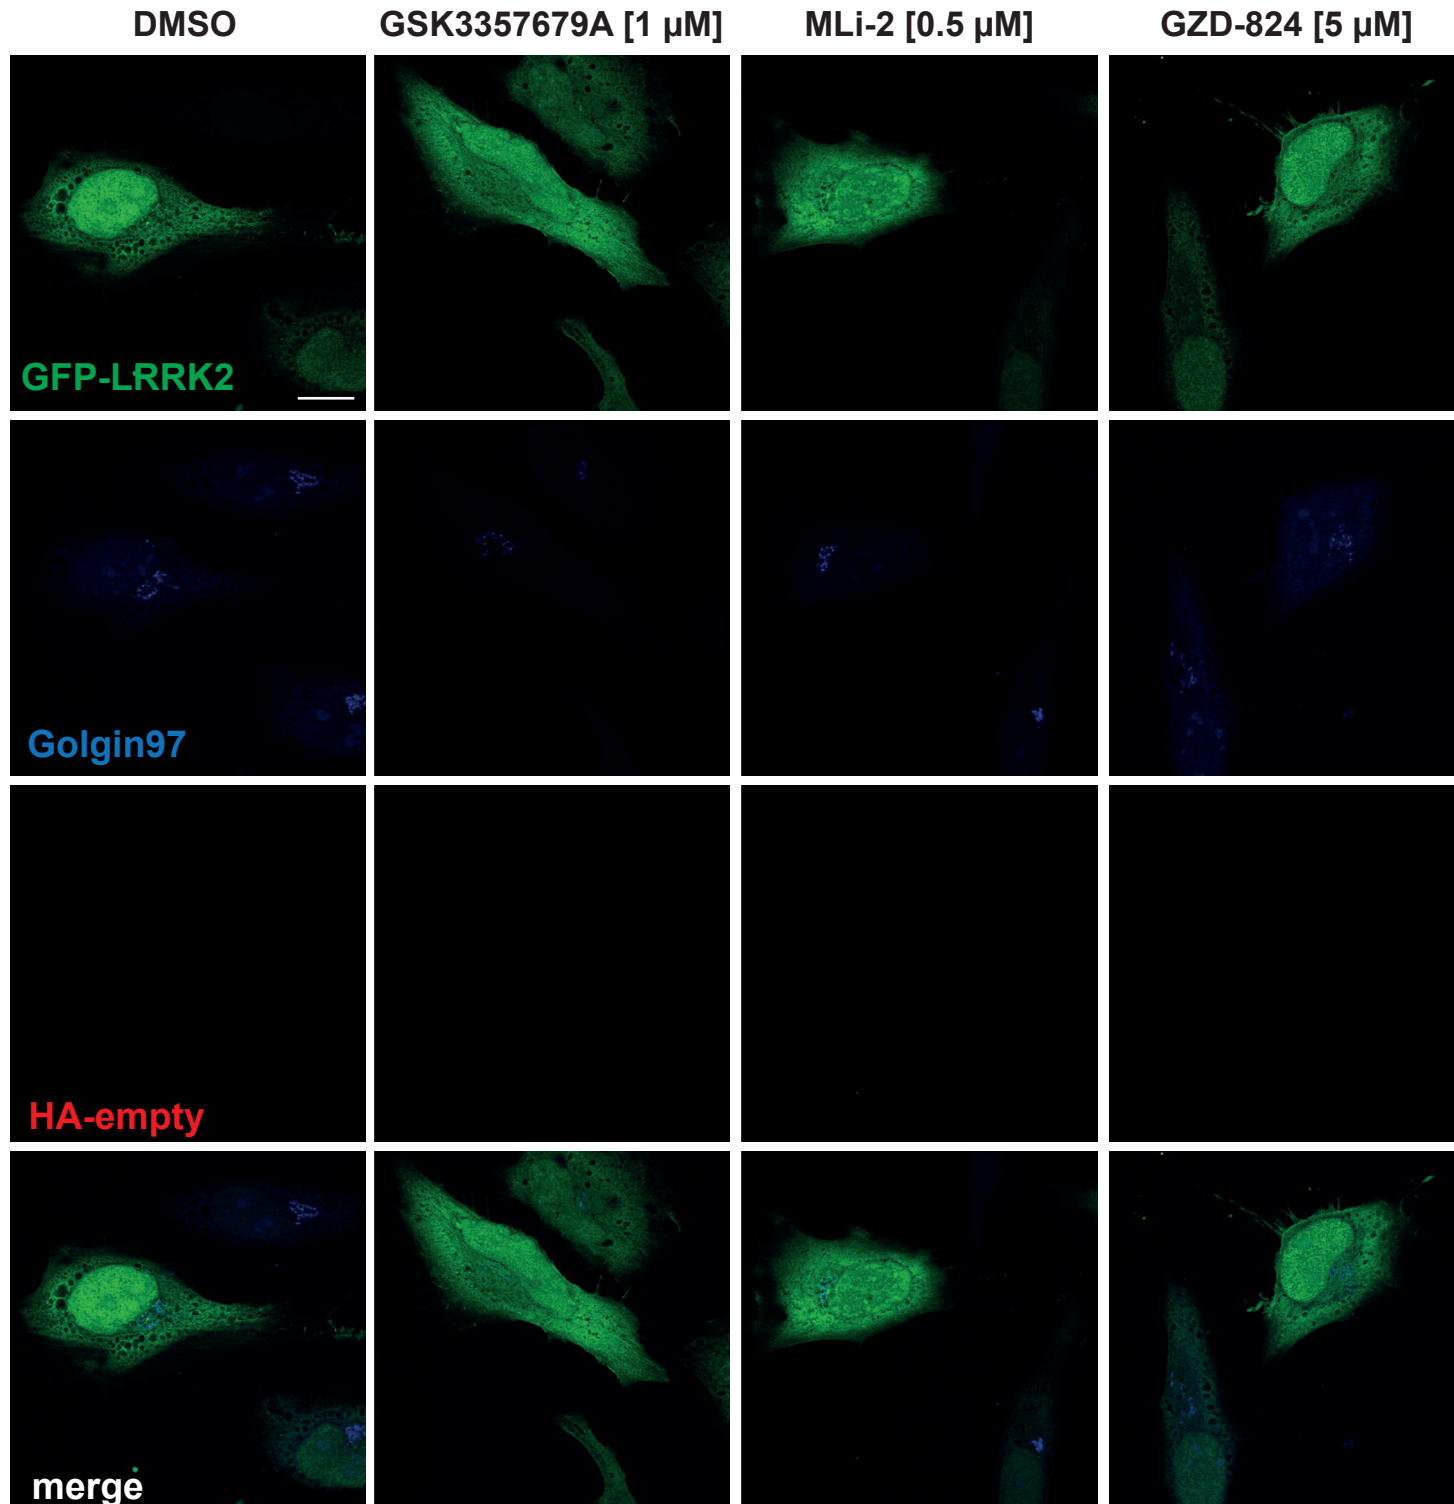

Supplement: BCJ-478-3555-s1.pdf [file BCJ-478-3555-s1.pdf]
